# Supplementary material for: Design and Optimization of an EEG-Based Brain Machine Interface (BMI) to an Upper-Limb Exoskeleton for Stroke Survivors
Source: PubMed Central journal article supplement (PMC4815250; doi:10.3389/fnins.2016.00122), 2016-03-31
Supplement: DataSheet1.pdf [file DataSheet1.pdf]

## 1 **I. Supplementary Methods: Source Analysis**

2 Cortical sources of movement related cortical potentials (MRCPs) were estimated for subjects  
3 S1, S2, and S4 (S3 declined MRI due to claustrophobia), on a trial by trial basis for days 4 and 5.  
4 The average source activation for each block and the grand-average across blocks for each day  
5 was then computed. The procedure for performing the source analysis is described below.

6 First, volumetric segmentation of the anatomical MR images was performed with BrainSuite  
7 software [A1] into the five different tissue segments within the head that consisted of scalp, outer  
8 skull, inner skull, cerebrospinal fluid (CSF) and white/gray matters. The anatomical regions of  
9 interest were further registered to a labeled atlas within the same software. Brainstorm, an open-  
10 source electromagnetic source imaging suite [A2], was then used for processing the anatomical  
11 and functional data for distributed source imaging. Raw EEG data from days 4 and 5 were pre-  
12 processed using the same approach as described in Section II-C1. EEG data analysis was  
13 primarily performed within Brainstorm and in addition the ICA toolbox from Curry 7 software  
14 (Compumedics, Charlotte, USA) was used to remove artifacts related to eye blinks, heart beats  
15 and bad blocks.

16 Further, co-registration between EEG and MRI data was done by projecting standard three  
17 dimensional EEG sensor positions on to the subject specific head surface and by applying  
18 operations such as geometrical translation, rotation and scaling. This procedure was very  
19 carefully designed in reference to video clips and images of the electrode positions of each  
20 subject that were obtained from each experiment and after visually matching visible electrodes  
21 (e.g. frontopolar, temporal and if visible the central electrodes) in MRI space.

22 Next, a three layer realistic head volume conductor model was prepared with OPENMEEG  
23 software [A3] by assigning constant isotropic electrical conductivity values representing the  
24 brain-skull interface, skull-skin interface and skin-air interface, where each layer is characterized  
25 by tessellations (vertices and triangles). For each layer a specific electrical conductivity value  
26 was defined as 0.33 S/m for the brain, 0.022 S/m for the skull and 0.33 S/m for the skin,  
27 respectively [A4], [A5].

28 Finally, cortically constrained source estimation was performed using the depth-weighted  
29 minimum norm estimate (MNE) [A6]. A source model containing over a set of  $\sim 15249$   
30 elementary current dipoles was computed with constrained normal orientation to a cortex and  
31 distributed over the individual cortical surface. The source estimation maps were interpolated to  
32 the subject specific head surface using Brainstorm's multilinear registration technique using  
33 default parameters. Statistically significant cortical maps of estimated sources were determined  
34 via Student's t-test (Bonferroni corrected). This was done by comparing individual sources of  
35 each trial with sources obtained from a pre-defined baseline. The baseline interval was taken  
36 from [-0.3s 0s] with respect to motor intent detection by the BMI.

37 Figures S-1, S-2, and S-3 show topographic distributions of activation loci for subjects S1,  
38 S2, and S4, respectively. Additionally, Tables S-1 and S-2 summarize the brain regions activated  
39 during user-driven (UD) and user-triggered (UT) modes for each subject. The variability in  
40 source activations across subjects is not surprising, given that the lesion size and location  
41 considerably varied across subjects. However, the results are only exploratory and a longitudinal  
42 study involving a larger patient population is being conducted to further understand the cortical  
43 sources of MRCPs in chronic stroke patients.

#### 44 **Supplementary references**

- 45 [A1] D. W. Shattuck and R. M. Leahy, “BrainSuite: an automated cortical surface identification tool,”  
46 *Med. Image Anal.*, vol. 6, no. 2, pp. 129–142, 2002.
- 47 [A2] F. Tadel, S. Baillet, J. C. Mosher, D. Pantazis, and R. M. Leahy, “Brainstorm: a user-friendly  
48 application for MEG/EEG analysis,” *Comput. Intell. Neurosci.*, vol. 2011, p. 8, 2011.
- 49 [A3] A. Gramfort, T. Papadopoulo, E. Olivi, M. Clerc, and others, “OpenMEEG: opensource software  
50 for quasistatic bioelectromagnetics,” *Biomed. Eng. Online*, vol. 9, no. 1, p. 45, 2010.
- 51 [A4] T. F. Oostendorp, J. Delbeke, and D. F. Stegeman, “The conductivity of the human skull: results of  
52 in vivo and in vitro measurements,” *Biomed. Eng. IEEE Trans.*, vol. 47, no. 11, pp. 1487–1492,  
53 2000.
- 54 [A5] Y. Zhang, W. van Drongelen, and B. He, “Estimation of in vivo brain-to-skull conductivity ratio in  
55 humans,” *Appl. Phys. Lett.*, vol. 89, no. 22, p. 223903, 2006.
- 56 [A6] S. Baillet, J. C. Mosher, and R. M. Leahy, “Electromagnetic brain mapping,” *Signal Process. Mag.*  
57 *IEEE*, vol. 18, no. 6, pp. 14–30, 2001.

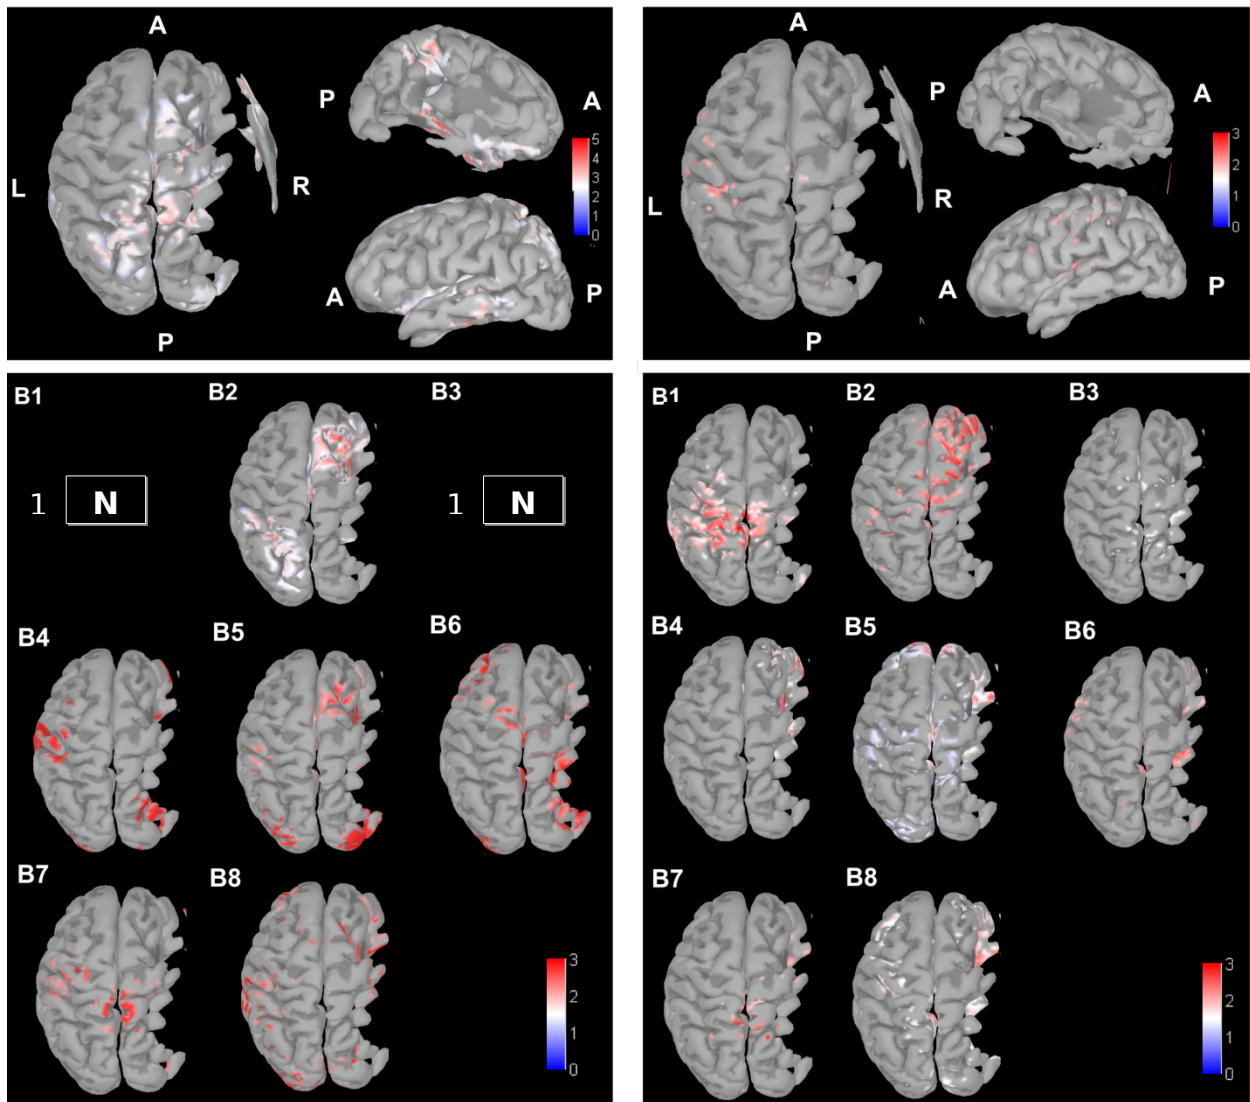

58 Figure S-1: Cortical source activity during days 4 (left column) and 5 (right column) for subject  
 59 S1 (Left hand paretic), UT mode.

60 **Left column:**

61 *Top panel:* Grand averaged source activity across all blocks from Day 4. The activation patterns  
 62 were localized on right precentral gyrus, primary motor cortex (BA 4) and left superior parietal  
 63 cortex, posterior to somatosensory cortex (BA 7), primary auditory cortex, temporal lobe in the  
 64 bank of the lateral sulcus (BA 42). Blocks for which source localization could not be performed  
 65 because of errors in the recorded EEG data, are marked by NA.

66 *Bottom panel:* Block wise averaged source activity.

67 **Right column:**

68 *Top panel:* Grand averaged source activity across all blocks from Day 5. The activation patterns  
 69 were localized on frontal lobe, postcentral gyrus (BA 6), right and left precentral gyrus, primary  
 70 motor cortex (BA 4), and superior parietal cortex, posterior to somatosensory cortex (BA 7).

71 *Bottom panel:* Block wise averaged source activity.

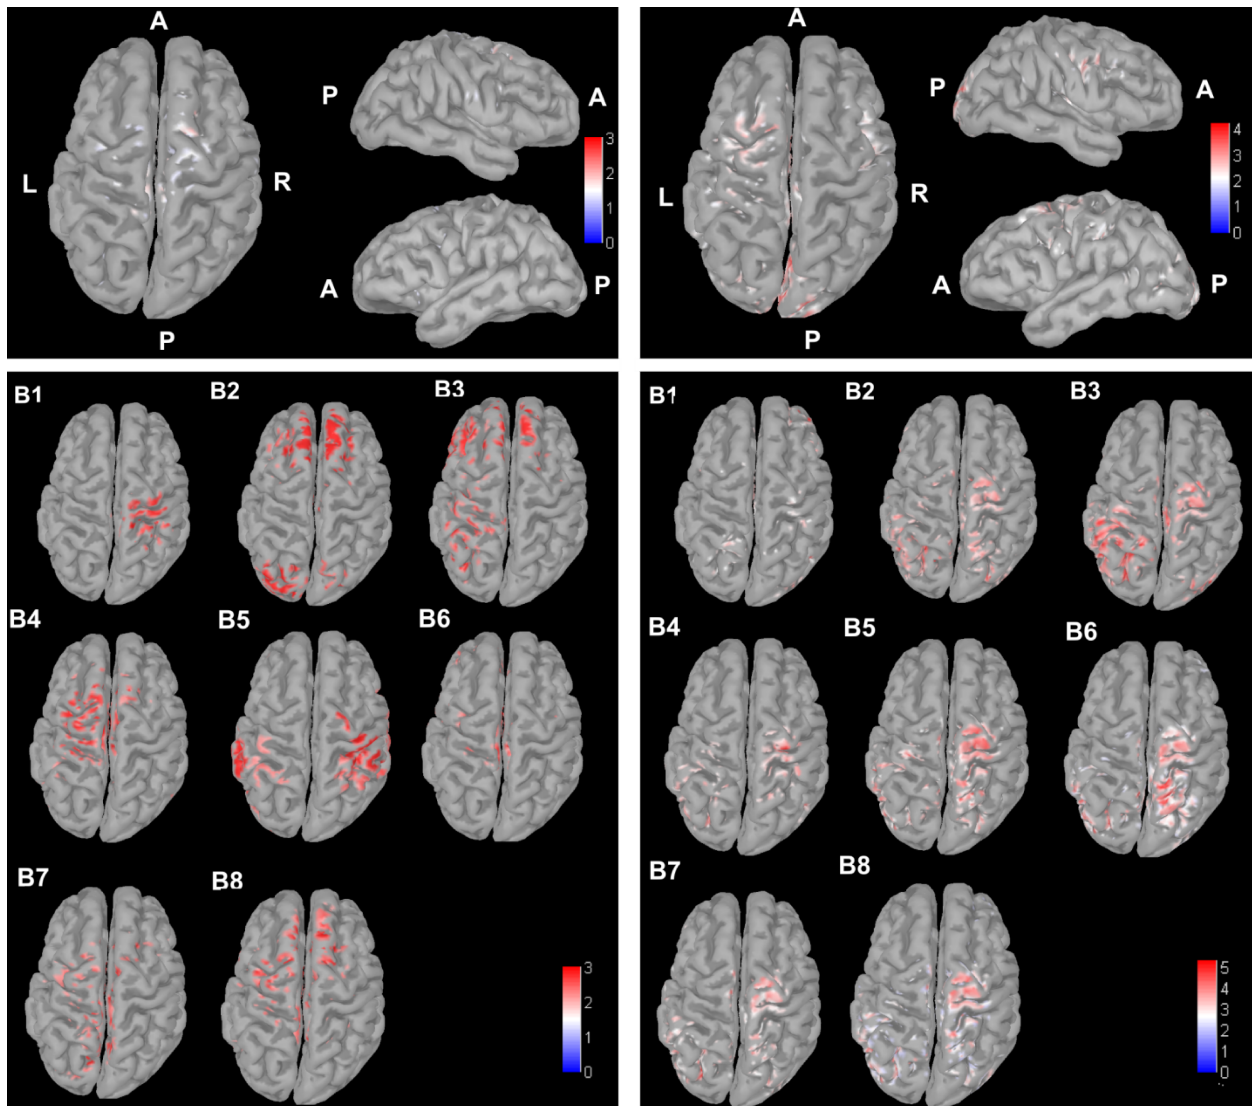

72 Figure S-2: Cortical source activity during day 4, UD mode (left column) and day 5, UT mode  
 73 (right column) for subject S2 (Right hand parietic).

74 **Left column:**

75 *Top panel:* Grand averaged source activity across all blocks from Day 4. The activation patterns  
 76 were localized on right superior frontal gyrus, prefrontal cortex (BA 8), right precentral gyrus,  
 77 primary motor cortex (BA 4), right/left postcentral gyrus, primary somatosensory cortex (BA 5).

78 *Bottom panel:* Block wise averaged source activity.

79 **Right column:**

80 *Top panel:* Grand averaged source activity across all blocks from Day 5. The activation patterns  
 81 were localized on right superior frontal gyrus, prefrontal cortex (BA 8), right precentral gyrus,  
 82 primary motor cortex (BA 4) and right/left postcentral gyrus, primary somatosensory cortex (BA  
 83 5).

84 *Bottom panel:* Block wise averaged source activity.

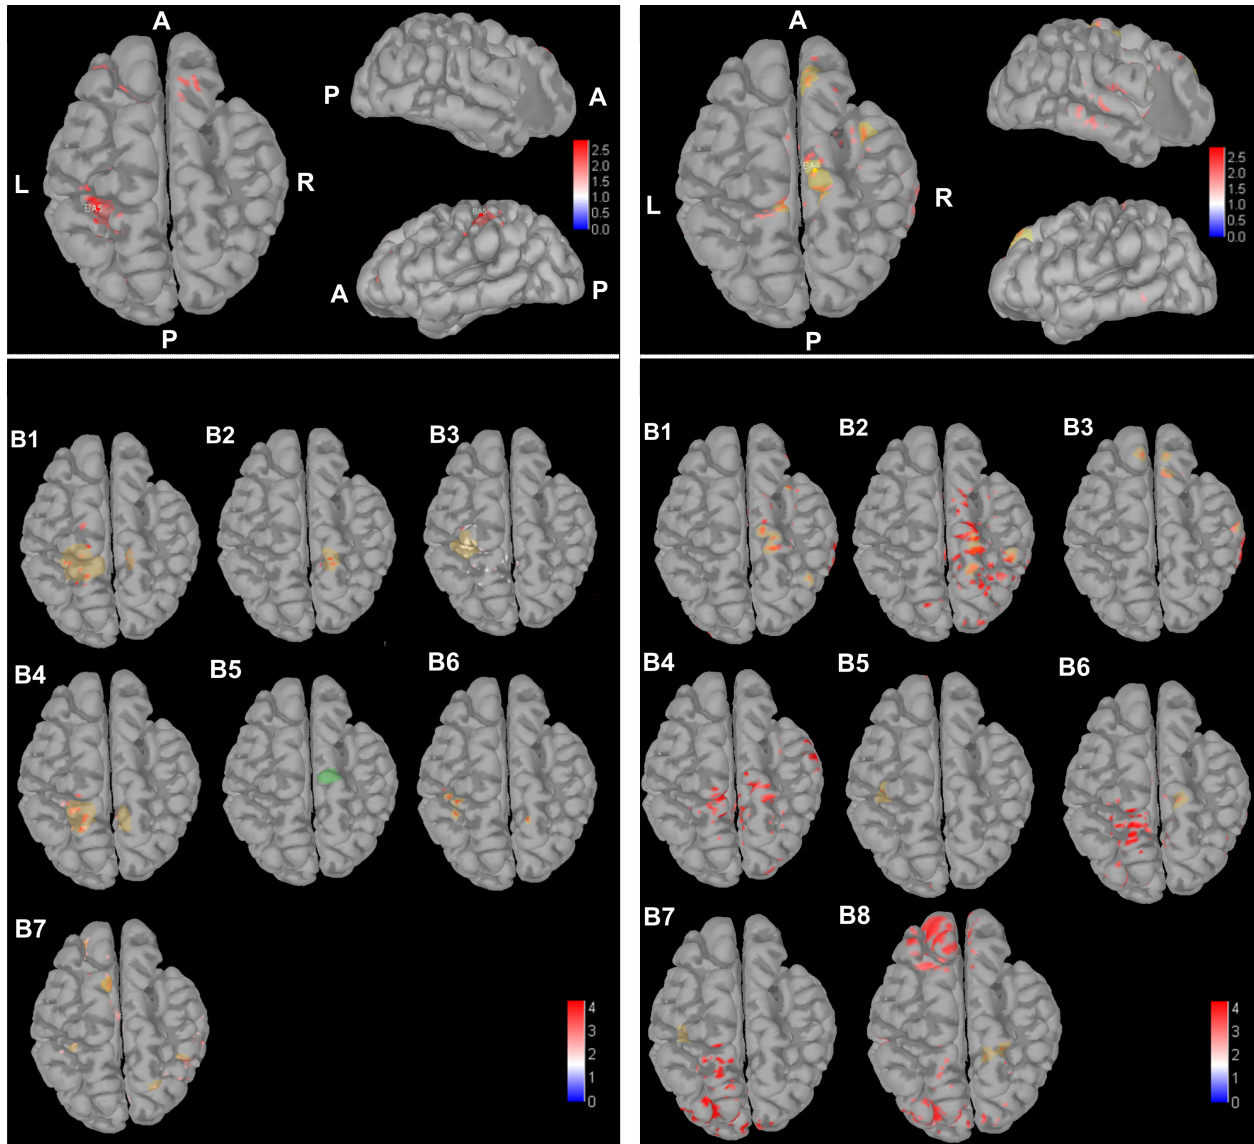

85 Figure S-3: Cortical source activity during day 4, UD mode (left column) and day 5, UT mode  
 86 (right column) for subject S4 (Left hand paretic).

87 **Left column:**

88 *Top panel:* Grand averaged source activity across all blocks from Day 4. The activation patterns  
 89 were localized on primary somatosensory cortex (BA 5) and other sources were localized on  
 90 right superior frontal area (BA 9).

91 *Bottom panel:* Block wise averaged source activity. Sources on Blocks B2, B5 show significant  
 92 activation on right primary motor cortex (BA 4) and B1, B4, B6 show involvement of bilateral  
 93 cortical areas of primary sensorimotor (BA 4, BA 5). The source activations for B3 were  
 94 localized on left primary motor cortex, and for B7 activation patterns were not focal.

95 **Right column:**

96 *Top panel:* Grand averaged source activity across all blocks from Day 5. The activation patterns  
 97 were localized on right primary motor cortex (BA 4) and on right superior frontal area (BA 9) as  
 98 well as on right temporal lobe (BA 20, 21, 22).

99 *Bottom panel:* Sources across Blocks B1, B2, B4, B6, B8 show significant activation both on  
 100 sensory and motor cortices (BA 2, 4, 5) and B5, B7 show involvement of cortical areas  
 101 responsible for integration of visual and motor information (BA 5, 7).

102 **Table S-1: Summary of the brain regions activated during the user-driven mode when**  
 103 **motor intent was detected by closed-loop BMI controller. Grand averaged activity across**  
 104 **all blocks is listed.**

| Subjects | Cerebral Regions and Brodmann Areas                                                                                                                                                          | Functional Area Descriptions                                                                                                                                                                                                         | t-statistic (p < 0.05) |
|----------|----------------------------------------------------------------------------------------------------------------------------------------------------------------------------------------------|--------------------------------------------------------------------------------------------------------------------------------------------------------------------------------------------------------------------------------------|------------------------|
| S2       | Right superior frontal gyrus, prefrontal cortex (BA 8)<br><br>Right precentral gyrus, primary motor cortex (BA 4);<br><br>Right/left postcentral gyrus, primary somatosensory cortex (BA 5); | BA 8: It forms the premotor cortex together with parts of BA 6, Planning of movement.<br><br>BA 4 : Control of voluntary movements; Contains motor homunculus;<br><br>BA 5: Somatosensory processing and association, muscle imagery | 4.671                  |
| S4       | Left postcentral gyrus, primary somatosensory cortex (BA 5);<br><br>Right and left superior frontal gyrus, prefrontal cortex (BA 9)                                                          | BA 5: Somatosensory processing and association, muscle imagery<br><br>BA 9: Executive function, cognitive control                                                                                                                    | 2.837                  |

105 Abbreviation: BA - Brodmann area

106 **Table S-2: Summary of the brain regions activated during the user-triggered mode when**  
 107 **motor intent was detected by closed-loop BMI controller. Grand averaged activity across**  
 108 **all blocks is listed.**

| N          | Cerebral Regions and Brodmann Areas                                                                                                                                                                                          | Functional Area Descriptions                                                                                                                                                                                                                                                                                         | t-statistic (p < 0.05) |
|------------|------------------------------------------------------------------------------------------------------------------------------------------------------------------------------------------------------------------------------|----------------------------------------------------------------------------------------------------------------------------------------------------------------------------------------------------------------------------------------------------------------------------------------------------------------------|------------------------|
| S1 (Day 4) | Right precentral gyrus, primary motor cortex (BA 4);<br><br>Left superior parietal cortex, posterior to somatosensory cortex (BA 7),<br><br>Primary auditory cortex, Temporal lobe in the bank of the lateral sulcus (BA 42) | BA 4 : Control of voluntary movements; Contains motor homunculus;<br><br>BA 7: Integration of visual and motor information; Visuo-motor coordination<br><br>BA 42: Early processing auditory information                                                                                                             | 3.186                  |
| S1 (Day 5) | Frontal lobe, Postcentral gyrus (BA 6)<br><br>Right and left precentral gyrus, Primary motor cortex (BA 4)<br><br>Superior parietal cortex, Posterior to Somatosensory cortex (BA 7)                                         | BA 6: Sensory guidance of movement<br>Control of proximal and trunk muscles of the body<br><br>BA 4 : Control of voluntary movements; Contains motor homunculus;<br><br>BA 7: Integration of visual and motor information. Together with BA5, it forms the secondary somatosensory cortex. Visuo-motor coordination. | 7.225                  |
| S2         | Right superior frontal gyrus, prefrontal cortex (BA 8)<br><br>Right precentral gyrus, primary motor cortex (BA 4);<br><br>Right/left postcentral gyrus, primary somatosensory cortex (BA 5);                                 | BA 8 : It forms the premotor cortex together with parts of BA 6, Planning of movement.<br><br>BA 4 : Control of voluntary movements; Contains motor homunculus;<br><br>BA 5: Somatosensory processing and association, muscle imagery                                                                                | 4.671                  |

|    |                                                                                                                                                                                             |                                                                                                                                                                                                                                                                                                                              |       |
|----|---------------------------------------------------------------------------------------------------------------------------------------------------------------------------------------------|------------------------------------------------------------------------------------------------------------------------------------------------------------------------------------------------------------------------------------------------------------------------------------------------------------------------------|-------|
| S4 | <p>Frontal lobe, Postcentral gyrus (BA 6)</p> <p>Right and left precentral gyrus, Primary motor cortex (BA 4)</p> <p>Superior parietal cortex, Posterior to Somatosensory cortex (BA 7)</p> | <p>BA 6: Sensory guidance of movement<br/>Control of proximal and trunk muscles of the body</p> <p>BA 4 : Control of voluntary movements; Contains motor homunculus;</p> <p>BA 7: Integration of visual and motor information. Together with BA5, it forms the secondary somatosensory cortex. Visuo-motor coordination.</p> | 7.225 |
|----|---------------------------------------------------------------------------------------------------------------------------------------------------------------------------------------------|------------------------------------------------------------------------------------------------------------------------------------------------------------------------------------------------------------------------------------------------------------------------------------------------------------------------------|-------|



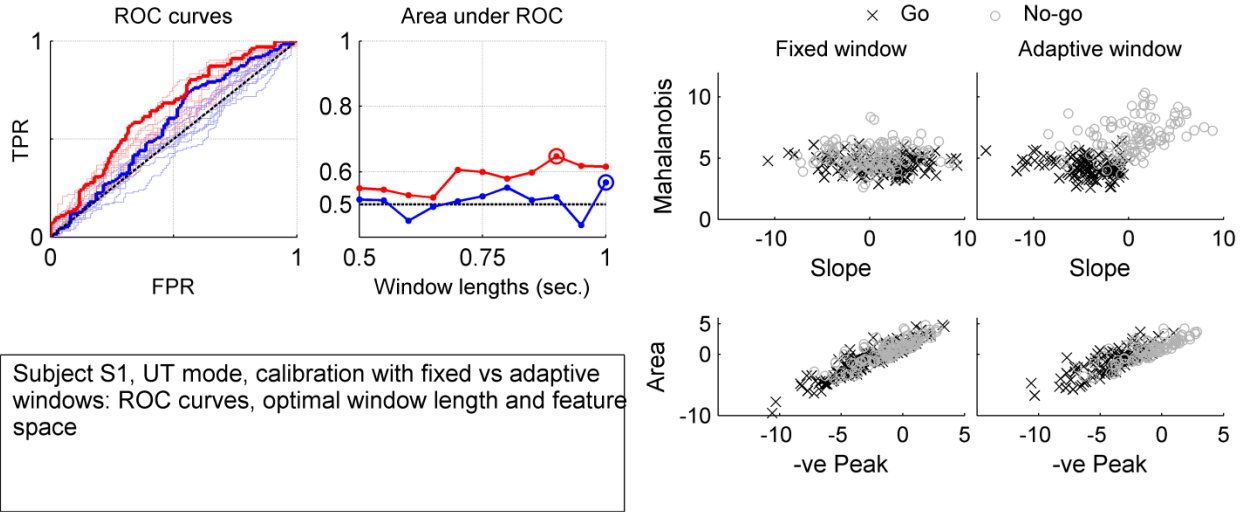

109 Figure S-4: Comparison of fixed and adaptive window techniques for optimal window selection  
 110 for subject S1, user-triggered (UT) mode

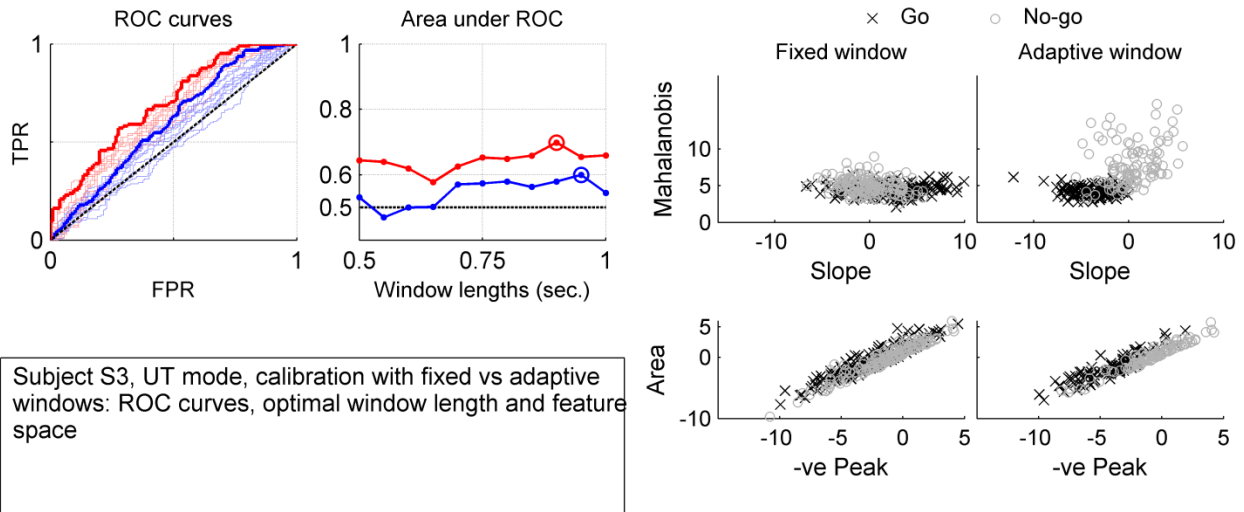

111 Figure S-5: Comparison of fixed and adaptive window techniques for optimal window selection  
 112 for subject S3, user-triggered (UT) mode

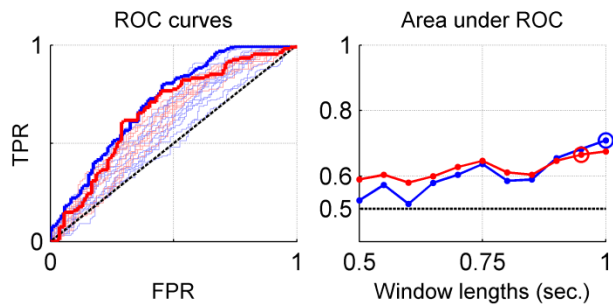

Subject S2, UD mode, calibration with fixed vs adaptive windows: ROC curves, optimal window length and feature space

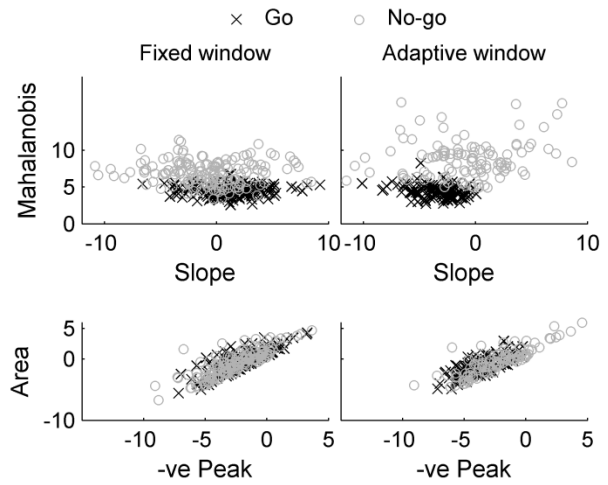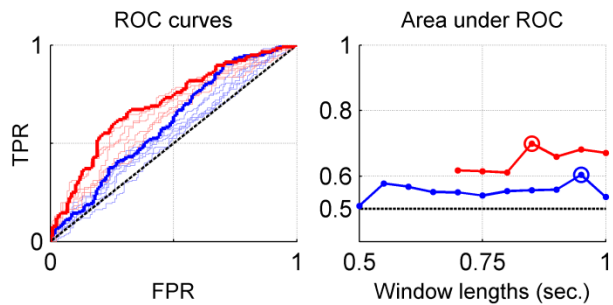

Subject S2, UT mode, calibration with fixed vs adaptive windows: ROC curves, optimal window length and feature space

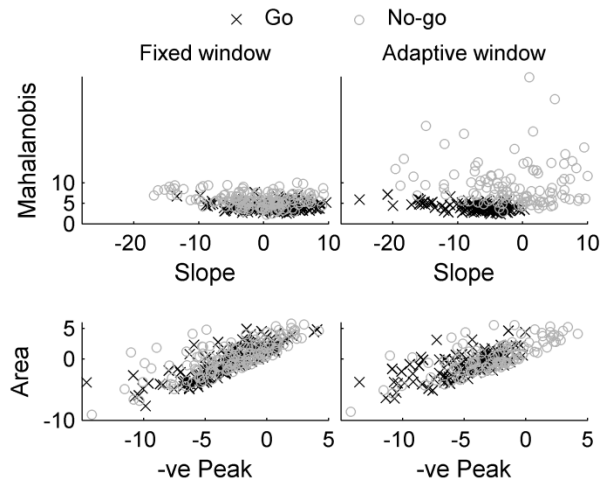

113 Figure S-6: Comparison of fixed and adaptive window techniques for optimal window selection  
 114 for subject S2, user-driven (UD) (top) and user-triggered (UT) (bottom) modes

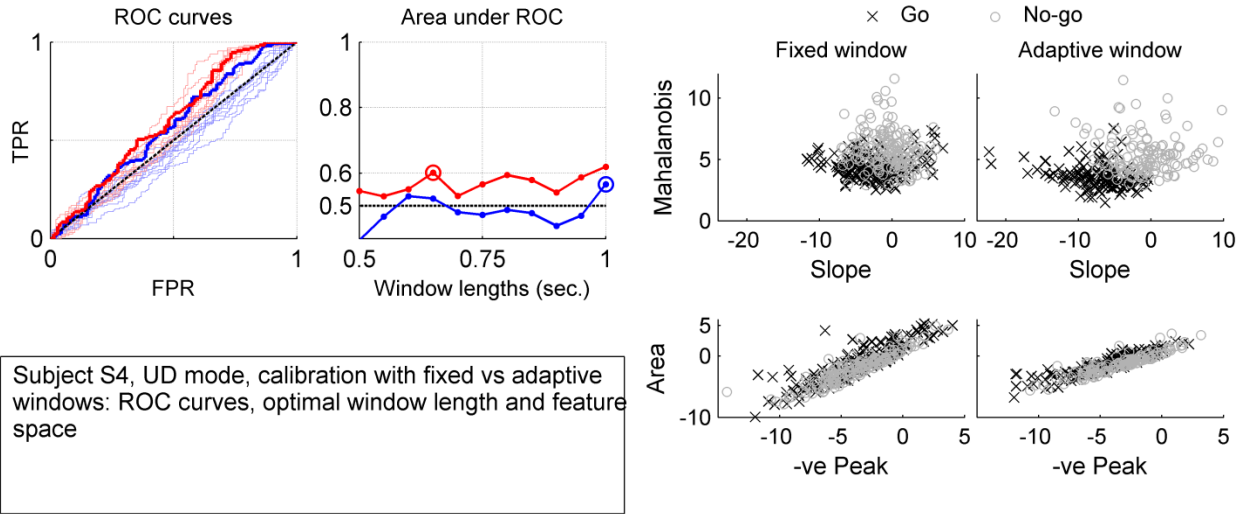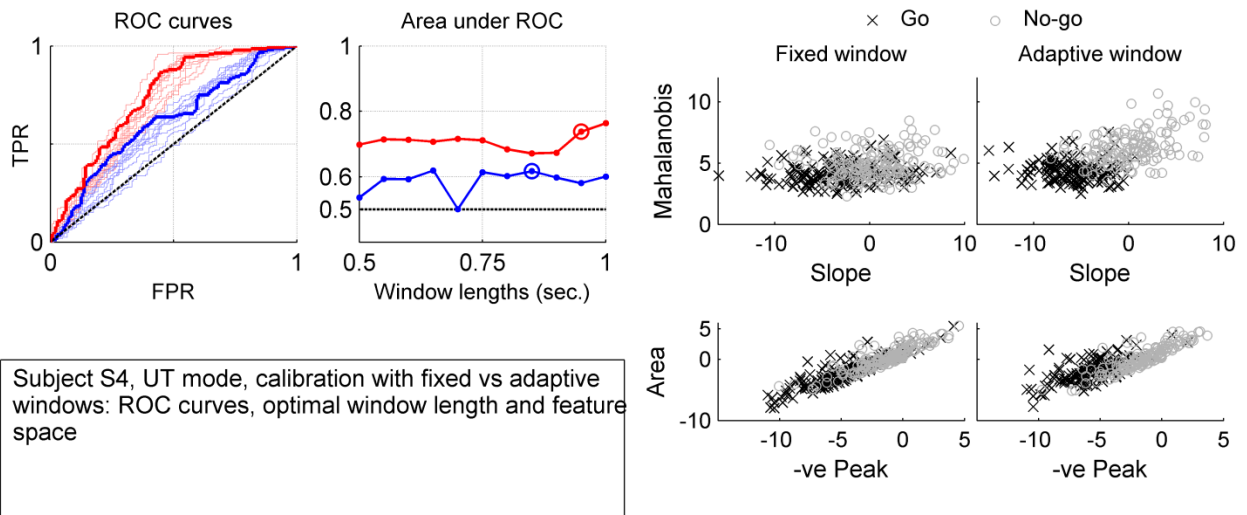

115 Figure S-7: Comparison of fixed and adaptive window techniques for optimal window selection  
 116 for subject S4, user-driven (UD) (top) and user-triggered (UT) (bottom) modes. Results for  
 117 subject S4, UT mode are also reported in the paper.

**TABLE S-3**  
**MEAN (SD) VALUES FOR METRICS USED TO EVALUATE BMI PERFORMANCE DURING CLOSED-LOOP TESTING**

| Subject                       | True Positive Rate (%) |               | False Positive Rate (%) |               | Detection latency (s) |              | Subject ratings <sup>#</sup> |             |
|-------------------------------|------------------------|---------------|-------------------------|---------------|-----------------------|--------------|------------------------------|-------------|
|                               | Day 4                  | Day 5         | Day 4                   | Day 5         | Day 4                 | Day 5        | Day 4                        | Day 5       |
| S1 <sup>†</sup>               | 59 (28)                | 60 (9)        | 65 (32)                 | 59 (39)       | -0.50 (0.43)          | -0.46 (0.40) | 2.29 (1.46)                  | 2.48 (1.47) |
| S2 <sup>‡</sup>               | 81 (17)                | 60 (17)       | 0 (0)                   | 13 (25)       | -0.68 (0.78)          | -0.48 (0.56) | 4.09 (1.36)                  | 3.17 (1.72) |
| S3 <sup>†</sup>               | 52 (16)                | 73 (10)       | 35 (44)                 | 28 (30)       | -0.35 (0.39)          | -0.61 (0.32) | 2.93 (1.78)                  | 3.27 (1.56) |
| S4 <sup>‡</sup>               | 59 (9)                 | 79 (12)       | 8 (14)                  | 6 (18)        | -0.31 (0.50)          | 0.30 (0.90)  | 3.29 (1.77)                  | 3.83 (1.42) |
| Overall mean (SD) per day     | 62.71 (21.43)          | 67.08 (14.55) | 27.74 (37.46)           | 27.50 (35.64) | -0.48 (0.18)          | -0.26 (0.43) | 3.15 (1.73)                  | 3.15 (1.63) |
| Overall mean (SD) across days | 64.86 (18.35)          |               | 27.62 (36.37)           |               | -0.367 (0.328)        |              | 3.15 (1.68)                  |             |

<sup>#</sup> 5-point subject rating, ranging from 1-5, where 1 implied completely inaccurate and 5 implied completely accurate BMI decision for a trial.

<sup>†</sup> BMI calibrated using user-triggered mode only was used for closed-loop testing on both days.

<sup>‡</sup> BMI calibrated using user-driven and user-triggered modes were used for closed-loop testing on days 4 and 5, respectively.
